# Supplementary material
Source: PubMed Central journal article supplement (PMC6870200)
Supplement: HBM-34-543-s001.pdf [file HBM-34-543-s001.pdf]

## Supplementary Materials

### Effect of auditory input on activations in infant diverse cortical regions during audio-visual processing

Hama Watanabe<sup>1</sup>, Fumitaka Homae<sup>2</sup>, Tamami Nakano<sup>3</sup>, Daisuke Tsuzuki<sup>4</sup>,  
Lkhamsuren Enkhtur<sup>5</sup>, Kiyotaka Nemoto<sup>6</sup>, Ippeita Dan<sup>4</sup>, and Gentaro Taga<sup>1,7</sup>

<sup>1</sup> Graduate School of Education, University of Tokyo, 7-3-1 Hongo, Bunkyo-ku, Tokyo 113-0033, Japan

<sup>2</sup> Department of Language Sciences, Tokyo Metropolitan University, 1-1 Minami Osawa, Hachioji, Tokyo 192-0397, Japan

<sup>3</sup> Department of Physiology, School of Medicine, Juntendo University, 2-1-1 Hongo, Bunkyo-ku, Tokyo 113-8421, Japan

<sup>4</sup> Center for Development of Advanced Medical Technology, Jichi Medical University, 311-1 Yakushiji, Shimotsuke, Tochigi 329-0498, Japan

<sup>5</sup> Graduate School of System and Information Engineering, University of Tsukuba, 1-1-1 Tennodai, Tsukuba, Ibaraki 305-8577, Japan

<sup>6</sup> Department of Psychiatry, Graduate School of Comprehensive Human Sciences, University of Tsukuba, 1-1-1 Tennodai, Tsukuba, Ibaraki 305-8577, Japan

<sup>7</sup> Japan Science and Technology Agency (CREST), 4-1-8 Honcho, Kawaguchi, Saitama 332-0012, Japan

Table SI. Anatomical locations of the 94 measurement channels.  
(Virtual registration via adult AAL template)

| Left hemisphere |          |        |       |     |                                                                        | Right hemisphere           |        |          |        |       |      |                                                                                |                              |
|-----------------|----------|--------|-------|-----|------------------------------------------------------------------------|----------------------------|--------|----------|--------|-------|------|--------------------------------------------------------------------------------|------------------------------|
| Ch No.          | Position |        |       | SD  | Anatom Label (AAL)                                                     | %                          | Ch No. | Position |        |       | SD   | Anatom Label (AAL)                                                             | %                            |
|                 | x        | y      | z     |     |                                                                        |                            |        | x        | y      | z     |      |                                                                                |                              |
| L1              | -13.3    | -96.4  | 30.1  | 9.8 | Occipital_Sup_L<br>Cuneus_L                                            | 83.9<br>16.1               | R1     | 12.7     | -95.7  | 29.5  | 10.2 | Occipital_Sup_R<br>Cuneus_R<br>Cuneus_L                                        | 69.0<br>19.5<br>11.4         |
| L2              | -14.4    | -105.5 | 6.6   | 8.2 | Occipital_Mid_L<br>Occipital_Sup_L<br>Calcarine_L                      | 82.4<br>17.1<br>0.5        | R2     | 13.3     | -104.2 | 6.1   | 8.2  | Calcarine_R<br>Occipital_Sup_R<br>Cuneus_R<br>Calcarine_L                      | 32.7<br>30.3<br>22.3<br>14.7 |
| L3              | -22.0    | -87.5  | 41.9  | 9.7 | Occipital_Sup_L<br>Occipital_Mid_L<br>Parietal_Inf_L<br>Parietal_Sup_L | 78.7<br>15.8<br>4.7<br>0.8 | R3     | 20.3     | -88.0  | 42.4  | 9.4  | Occipital_Sup_R<br>Cuneus_R<br>Parietal_Sup_R                                  | 53.1<br>46.5<br>0.4          |
| L4              | -22.5    | -99.9  | 17.4  | 9.5 | Occipital_Mid_L<br>Occipital_Sup_L                                     | 52.4<br>47.6               | R4     | 21.2     | -100.2 | 16.7  | 8.5  | Occipital_Sup_R<br>Cuneus_R<br>Occipital_Mid_R                                 | 88.6<br>10.4<br>1.0          |
| L5              | -23.7    | -103.4 | -5.3  | 7.2 | Occipital_Mid_L<br>Occipital_Inf_L<br>Calcarine_L                      | 55.3<br>30.7<br>14.0       | R5     | 21.8     | -102.8 | -5.8  | 8.3  | Lingual_R<br>Occipital_Inf_R<br>Calcarine_R<br>Occipital_Mid_R                 | 47.9<br>35.7<br>15.0<br>1.4  |
| L6              | -31.6    | -90.2  | 31.4  | 9.2 | Occipital_Mid_L<br>Occipital_Sup_L                                     | 72.1<br>27.9               | R6     | 29.6     | -89.8  | 30.3  | 8.9  | Occipital_Sup_R<br>Occipital_Mid_R                                             | 57.7<br>42.3                 |
| L7              | -32.8    | -98.3  | 4.8   | 8.4 | Occipital_Mid_L                                                        | 100.0                      | R7     | 30.9     | -98.4  | 4.6   | 7.4  | Occipital_Mid_R<br>Calcarine_R<br>Occipital_Sup_R                              | 87.1<br>7.9<br>5.0           |
| L8              | -37.9    | -80.8  | 42.6  | 7.3 | Occipital_Mid_L<br>Parietal_Inf_L<br>Angular_L                         | 68.5<br>26.0<br>5.5        | R8     | 37.0     | -80.3  | 42.5  | 7.0  | Occipital_Sup_R<br>Occipital_Mid_R<br>Angular_R<br>Parietal_Sup_R              | 40.4<br>35.1<br>23.7<br>0.9  |
| L9              | -41.8    | -88.9  | 18.6  | 8.2 | Occipital_Mid_L                                                        | 100.0                      | R9     | 40.4     | -88.4  | 17.7  | 7.7  | Occipital_Mid_R                                                                | 100.0                        |
| L10             | -41.2    | -91.8  | -7.8  | 6.6 | Occipital_Mid_L<br>Lingual_L<br>Occipital_Inf_L                        | 82.2<br>10.3<br>7.5        | R10    | 40.4     | -91.1  | -8.3  | 7.0  | Occipital_Inf_R                                                                | 100.0                        |
| L11             | -47.7    | -78.9  | 31.4  | 7.6 | Occipital_Mid_L<br>Angular_L                                           | 55.6<br>44.4               | R11    | 46.6     | -78.1  | 31.2  | 7.3  | Occipital_Mid_R<br>Angular_R                                                   | 77.1<br>22.9                 |
| L12             | -49.8    | -83.5  | 4.6   | 6.6 | Occipital_Mid_L                                                        | 100.0                      | R12    | 49.1     | -83.0  | 4.9   | 6.5  | Occipital_Mid_R<br>Occipital_Inf_R                                             | 89.4<br>10.6                 |
| L13             | -51.1    | -68.3  | 42.3  | 7.1 | Angular_L<br>Occipital_Mid_L<br>Parietal_Inf_L                         | 92.0<br>6.4<br>1.6         | R13    | 50.5     | -67.5  | 42.7  | 6.6  | Angular_R<br>Parietal_Inf_R                                                    | 99.0<br>1.0                  |
| L14             | -55.2    | -72.3  | 18.4  | 7.0 | Temporal_Mid_L<br>Occipital_Mid_L<br>Angular_L                         | 55.3<br>36.4<br>8.3        | R14    | 54.6     | -72.1  | 18.3  | 6.8  | Temporal_Mid_R<br>Occipital_Mid_R                                              | 87.0<br>13.0                 |
| L15             | -55.7    | -72.6  | -8.1  | 5.7 | Occipital_Inf_L<br>Temporal_Inf_L<br>Angular_L                         | 96.5<br>3.5<br>99.3        | R15    | 54.8     | -72.6  | -9.1  | 6.8  | Temporal_Inf_R<br>Occipital_Inf_R<br>Angular_R                                 | 60.0<br>40.0<br>97.8         |
| L16             | -59.3    | -61.7  | 30.9  | 6.9 | Supramarginal_L<br>Temporal_Mid_L                                      | 0.7<br>100.0               | R16    | 59.0     | -61.1  | 31.0  | 6.0  | Occipital_Mid_R<br>Temporal_Mid_R                                              | 2.2<br>100.0                 |
| L17             | -62.3    | -62.8  | 4.1   | 5.3 | Temporal_Mid_L                                                         | 100.0                      | R17    | 61.7     | -62.2  | 3.9   | 5.3  | Temporal_Mid_R                                                                 | 100.0                        |
| L18             | -60.1    | -51.1  | 42.3  | 7.1 | Parietal_Inf_L<br>Supramarginal_L<br>Angular_L                         | 75.0<br>19.3<br>5.7        | R18    | 60.7     | -50.6  | 42.7  | 6.3  | Parietal_Inf_R<br>Supramarginal_R<br>Angular_R                                 | 71.4<br>21.0<br>7.6          |
| L19             | -65.6    | -53.1  | 17.5  | 5.8 | Temporal_Sup_L<br>Temporal_Mid_L<br>Supramarginal_L                    | 48.0<br>41.0<br>11.0       | R19    | 65.2     | -52.2  | 17.4  | 5.8  | Temporal_Sup_R<br>Temporal_Mid_R                                               | 50.5<br>49.5                 |
| L20             | -66.1    | -51.4  | -9.6  | 4.0 | Temporal_Mid_L<br>Temporal_Inf_L                                       | 94.1<br>5.9                | R20    | 66.8     | -50.8  | -8.9  | 4.4  | Temporal_Inf_R<br>Temporal_Mid_R                                               | 58.8<br>41.2                 |
| L21             | -65.4    | -42.4  | 31.1  | 6.5 | Supramarginal_L                                                        | 100.0                      | R21    | 67.0     | -41.7  | 31.0  | 6.0  | Supramarginal_R                                                                | 100.0                        |
| L22             | -68.9    | -41.9  | 2.9   | 4.7 | Temporal_Mid_L                                                         | 100.0                      | R22    | 70.3     | -41.6  | 3.1   | 4.6  | Temporal_Mid_R                                                                 | 100.0                        |
| L23             | -64.9    | -33.6  | 42.5  | 6.0 | Supramarginal_L<br>Parietal_Inf_L                                      | 92.0<br>8.0                | R23    | 66.4     | -32.1  | 42.6  | 5.5  | Supramarginal_R                                                                | 100.0                        |
| L24             | -68.5    | -31.6  | 17.4  | 6.7 | Temporal_Sup_L<br>Supramarginal_L                                      | 67.6<br>32.4               | R24    | 70.0     | -30.9  | 16.9  | 5.9  | Temporal_Sup_R                                                                 | 100.0                        |
| L25             | -70.1    | -28.3  | -10.7 | 4.6 | Temporal_Mid_L                                                         | 100.0                      | R25    | 71.8     | -28.8  | -10.2 | 3.9  | Temporal_Mid_R                                                                 | 100.0                        |
| L26             | -67.0    | -21.1  | 31.0  | 6.6 | Supramarginal_L<br>Postcentral_L                                       | 71.6<br>28.4               | R26    | 68.9     | -21.4  | 30.4  | 6.2  | Supramarginal_R                                                                | 100.0                        |
| L27             | -69.0    | -19.4  | 1.7   | 5.8 | Temporal_Mid_L<br>Temporal_Sup_L                                       | 79.8<br>20.2               | R27    | 71.0     | -18.7  | 2.9   | 4.2  | Temporal_Sup_R                                                                 | 100.0                        |
| L28             | -62.0    | -11.2  | 40.8  | 6.3 | Postcentral_L<br>Supramarginal_L                                       | 91.8<br>8.2                | R28    | 63.6     | -10.4  | 40.5  | 6.2  | Postcentral_R<br>Precentral_R                                                  | 98.1<br>1.9                  |
| L29             | -66.3    | -5.3   | 18.5  | 5.4 | Postcentral_L                                                          | 100.0                      | R29    | 67.9     | -5.7   | 17.9  | 5.1  | Postcentral_R<br>Rolandic_Oper_R                                               | 95.0<br>5.0                  |
| L30             | -66.5    | -4.5   | -13.1 | 4.7 | Temporal_Mid_L                                                         | 100.0                      | R30    | 67.7     | -5.2   | -11.3 | 5.1  | Temporal_Mid_R<br>Temporal_Sup_R                                               | 57.9<br>42.1                 |
| L31             | -61.6    | 5.9    | 29.0  | 5.1 | Precentral_L<br>Postcentral_L<br>Frontal_Inf_Oper_L                    | 85.5<br>11.8<br>2.6        | R31    | 63.9     | 6.0    | 29.5  | 5.1  | Precentral_R<br>Postcentral_R                                                  | 90.9<br>9.1                  |
| L32             | -60.9    | 9.5    | 5.8   | 5.6 | Frontal_Inf_Oper_L<br>Rolandic_Oper_L<br>Temporal_Pole_Sup_L           | 55.8<br>42.1<br>2.1        | R32    | 62.4     | 7.9    | 5.8   | 5.8  | Rolandic_Oper_R<br>Temporal_Pole_Sup_R<br>Temporal_Sup_R<br>Frontal_Inf_Oper_R | 57.7<br>22.7<br>14.4<br>5.2  |
| L33             | -53.0    | 16.5   | 40.0  | 7.2 | Frontal_Mid_L<br>Precentral_L<br>Frontal_Inf_Oper_L                    | 50.0<br>34.7<br>15.3       | R33    | 53.8     | 15.3   | 40.4  | 6.3  | Frontal_Inf_Oper_R<br>Precentral_R<br>Frontal_Mid_R                            | 35.5<br>34.6<br>29.9         |
| L34             | -57.9    | 24.1   | 16.6  | 5.1 | Frontal_Inf_Tri_L<br>Frontal_Inf_Oper_L                                | 97.5<br>2.5                | R34    | 60.0     | 24.3   | 17.2  | 4.7  | Frontal_Inf_Tri_R<br>Frontal_Inf_Oper_R                                        | 83.8<br>16.2                 |
| L35             | -54.0    | 29.5   | -6.9  | 7.1 | Frontal_Inf_Orb_L<br>Frontal_Inf_Tri_L<br>Temporal_Pole_Sup_L          | 82.5<br>16.8<br>0.7        | R35    | 55.4     | 27.5   | -6.4  | 7.0  | Frontal_Inf_Orb_R<br>Frontal_Inf_Tri_R<br>Temporal_Pole_Sup_R                  | 94.2<br>4.3<br>1.4           |
| L36             | -50.0    | 33.4   | 28.0  | 6.0 | Frontal_Inf_Tri_L<br>Frontal_Mid_L                                     | 74.2<br>25.8               | R36    | 52.9     | 33.1   | 29.1  | 5.1  | Frontal_Inf_Tri_R<br>Frontal_Mid_R                                             | 80.9<br>19.1                 |
| L37             | -53.1    | 40.3   | 2.1   | 5.2 | Frontal_Inf_Tri_L<br>Frontal_Inf_Orb_L                                 | 92.8<br>7.2                | R37    | 55.8     | 39.4   | 3.1   | 4.4  | Frontal_Inf_Tri_R                                                              | 100.0                        |
| L38             | -39.5    | 38.5   | 38.7  | 5.9 | Frontal_Mid_L                                                          | 100.0                      | R38    | 42.0     | 38.0   | 39.6  | 5.5  | Frontal_Mid_R                                                                  | 100.0                        |
| L39             | -44.8    | 49.6   | 16.3  | 5.3 | Frontal_Mid_L<br>Frontal_Inf_Tri_L                                     | 81.9<br>18.1               | R39    | 47.0     | 49.7   | 16.7  | 4.5  | Frontal_Mid_R                                                                  | 100.0                        |
| L40             | -44.7    | 53.4   | -7.8  | 3.8 | Frontal_Mid_Orb_L<br>Frontal_Inf_Orb_L                                 | 97.1<br>2.9                | R40    | 47.3     | 53.8   | -7.7  | 4.0  | Frontal_Mid_Orb_R<br>Frontal_Inf_Orb_R                                         | 89.7<br>10.3                 |
| L41             | -33.8    | 54.2   | 27.9  | 5.4 | Frontal_Mid_L<br>Frontal_Sup_L                                         | 98.5<br>1.5                | R41    | 35.9     | 54.4   | 28.4  | 4.9  | Frontal_Mid_R                                                                  | 100.0                        |
| L42             | -36.9    | 62.8   | 3.8   | 5.1 | Frontal_Mid_L<br>Frontal_Sup_L<br>Frontal_Mid_Orb_L                    | 60.0<br>30.0<br>10.0       | R42    | 39.1     | 62.5   | 4.7   | 4.6  | Frontal_Mid_R                                                                  | 100.0                        |
| L43             | -19.7    | 53.1   | 39.9  | 5.6 | Frontal_Sup_L<br>Frontal_Mid_L                                         | 98.6<br>1.4                | R43    | 22.3     | 53.1   | 40.0  | 5.7  | Frontal_Sup_R                                                                  | 100.0                        |
| L44             | -23.2    | 66.6   | 17.4  | 5.2 | Frontal_Sup_L                                                          | 100.0                      | R44    | 25.4     | 67.2   | 17.3  | 4.4  | Frontal_Sup_R                                                                  | 100.0                        |
| L45             | -23.8    | 67.9   | -4.8  | 4.6 | Frontal_Sup_Orb_L<br>Frontal_Mid_Orb_L<br>Frontal_Sup_L                | 80.3<br>9.8<br>9.8         | R45    | 27.3     | 68.6   | -4.8  | 4.2  | Frontal_Sup_Orb_R<br>Frontal_Sup_R<br>Frontal_Mid_Orb_R                        | 86.3<br>11.8<br>2.0          |
| L46             | -10.1    | 63.4   | 31.5  | 5.1 | Frontal_Sup_Medial_L<br>Frontal_Sup_L                                  | 78.1<br>21.9               | R46    | 12.9     | 64.0   | 30.4  | 5.7  | Frontal_Sup_Medial_R<br>Frontal_Sup_R                                          | 54.5<br>45.5                 |
| L47             | -12.2    | 72.2   | 7.3   | 4.7 | Frontal_Sup_L<br>Frontal_Sup_Medial_L                                  | 64.9<br>35.1               | R47    | 14.2     | 72.0   | 7.3   | 4.2  | Frontal_Sup_Medial_R<br>Frontal_Sup_R                                          | 65.4<br>34.6                 |

Note. Anatomical labels are based on the Automated Anatomical Labeling map (AAL map) (Tzourio-Mazoyer et al., 2002). All values are in millimeters. SD stands for standard deviation. Abbreviations: L = Left hemisphere, R = Right hemisphere, Sup = Superior, Mid = Middle, Inf = Inferior, Oper = Opercular part, Tri = Triangular part, Orb = Orbital part.

Table SII. Locations of international 10-20 cortical projection points.

|     | Position |        |       | SD   |
|-----|----------|--------|-------|------|
|     | x        | y      | z     |      |
| Fpz | 3.0      | 68.1   | -3.0  | 5.4  |
| Fp1 | -22.0    | 67.8   | -6.5  | 4.0  |
| Fp2 | 25.6     | 68.0   | -7.0  | 3.6  |
| Fz  | 1.5      | 44.2   | 49.5  | 5.9  |
| F3  | -39.5    | 44.4   | 31.9  | 6.2  |
| F4  | 42.2     | 43.8   | 33.3  | 6.1  |
| F7  | -51.9    | 38.0   | -10.0 | 4.5  |
| F8  | 53.8     | 37.7   | -9.8  | 3.9  |
| Cz  | 0.8      | -13.5  | 74.1  | 9.8  |
| C3  | -54.6    | -15.9  | 54.5  | 6.6  |
| C4  | 56.1     | -15.7  | 54.0  | 6.8  |
| T3  | -70.0    | -18.2  | -11.8 | 4.8  |
| T4  | 70.9     | -17.8  | -10.8 | 4.1  |
| Pz  | -1.1     | -66.5  | 62.7  | 8.4  |
| P3  | -45.3    | -68.8  | 48.9  | 6.7  |
| P4  | 44.3     | -68.5  | 49.1  | 6.3  |
| T5  | -59.5    | -67.4  | -1.8  | 4.9  |
| T6  | 58.7     | -66.5  | -1.9  | 5.5  |
| Oz  | -3.2     | -102.6 | 12.2  | 10.2 |
| O1  | -23.9    | -102.3 | 7.4   | 8.1  |
| O2  | 22.6     | -102.7 | 7.2   | 7.0  |

Note. All values are in millimeters.  
SD stands for standard deviation.

Table SIII. Anatomical locations of the 94 measurement channels.

(Virtual registration via neonate AAL template)

| Left hemisphere |          |        |       |                          |       | Right hemisphere |          |        |       |                        |       |
|-----------------|----------|--------|-------|--------------------------|-------|------------------|----------|--------|-------|------------------------|-------|
| Ch No.          | Position |        |       | Anatom Label (AAL)       | %     | Ch No.           | Position |        |       | Anatom Label (AAL)     | %     |
|                 | x        | y      | z     |                          |       |                  | x        | y      | z     |                        |       |
| L1              | -13.3    | -96.4  | 30.1  | 9.8 Cuneus_L             | 59.1  | R1               | 12.7     | -95.7  | 29.5  | 10.2 Occipital_Sup_R   | 55.9  |
|                 |          |        |       | Occipital_Sup_L          | 40.9  |                  |          |        |       | Cuneus_R               | 44.1  |
|                 |          |        |       |                          |       |                  |          |        |       | Cuneus_L               | 11.4  |
| L2              | -14.4    | -105.5 | 6.6   | 8.2 Calcarine_L          | 85.2  | R2               | 13.3     | -104.2 | 6.1   | 8.2 Calcarine_R        | 54.4  |
|                 |          |        |       | Occipital_Mid_L          | 12.3  |                  |          |        |       | Lingual_R              | 40.4  |
|                 |          |        |       | Occipital_Sup_L          | 2.5   |                  |          |        |       | Occipital_Inf_R        | 5.3   |
| L3              | -22.0    | -87.5  | 41.9  | 9.7 Occipital_Sup_L      | 78.5  | R3               | 20.3     | -88.0  | 42.4  | 9.4 Occipital_Sup_R    | 70.1  |
|                 |          |        |       | Occipital_Mid_L          | 11.4  |                  |          |        |       | Cuneus_R               | 22.9  |
|                 |          |        |       | Cuneus_L                 | 10.2  |                  |          |        |       | Occipital_Mid_R        | 7.0   |
| L4              | -22.5    | -99.9  | 17.4  | 9.5 Occipital_Mid_L      | 67.9  | R4               | 21.2     | -100.2 | 16.7  | 8.5 Occipital_Sup_R    | 46.8  |
|                 |          |        |       | Occipital_Sup_L          | 32.1  |                  |          |        |       | Occipital_Mid_R        | 27.3  |
|                 |          |        |       |                          |       |                  |          |        |       | Calcarine_R            | 18.0  |
|                 |          |        |       |                          |       |                  |          |        |       | Cuneus_R               | 5.8   |
|                 |          |        |       |                          |       |                  |          |        |       | Occipital_Inf_R        | 2.2   |
| L5              | -23.7    | -103.4 | -5.3  | 7.2 Lingual_L            | 72.2  | R5               | 21.8     | -102.8 | -5.8  | 8.3 Lingual_R          | 65.0  |
|                 |          |        |       | Occipital_Inf_L          | 19.4  |                  |          |        |       | Occipital_Inf_R        | 35.0  |
|                 |          |        |       | Calcarine_L              | 5.6   |                  |          |        |       |                        |       |
|                 |          |        |       | Occipital_Mid_L          | 2.8   |                  |          |        |       |                        |       |
| L6              | -31.6    | -90.2  | 31.4  | 9.2 Occipital_Mid_L      | 79.5  | R6               | 29.6     | -89.8  | 30.3  | 8.9 Occipital_Mid_R    | 66.4  |
|                 |          |        |       | Occipital_Sup_L          | 20.5  |                  |          |        |       | Occipital_Sup_R        | 33.6  |
| L7              | -32.8    | -98.3  | 4.8   | 8.4 Occipital_Mid_L      | 85.8  | R7               | 30.9     | -98.4  | 4.6   | 7.4 Occipital_Inf_R    | 87.1  |
|                 |          |        |       | Occipital_Inf_L          | 14.2  |                  |          |        |       | Occipital_Mid_R        | 12.9  |
| L8              | -37.9    | -80.8  | 42.6  | 7.3 Occipital_Mid_L      | 98.4  | R8               | 37.0     | -80.3  | 42.5  | 7.0 Occipital_Mid_R    | 92.7  |
|                 |          |        |       | Parietal_Inf_L           | 1.6   |                  |          |        |       | Angular_R              | 7.3   |
| L9              | -41.8    | -88.9  | 18.6  | 8.2 Occipital_Mid_L      | 100.0 | R9               | 40.4     | -88.4  | 17.7  | 7.7 Occipital_Mid_R    | 100.0 |
| L10             | -41.2    | -91.8  | -7.8  | 6.6 Lingual_L            | 50.0  | R10              | 40.4     | -91.1  | -8.3  | 7.0 Occipital_Inf_R    | 100.0 |
|                 |          |        |       | Occipital_Inf_L          | 40.9  |                  |          |        |       |                        |       |
|                 |          |        |       | Occipital_Mid_L          | 4.5   |                  |          |        |       |                        |       |
|                 |          |        |       | Fusiform_L               | 4.5   |                  |          |        |       |                        |       |
| L11             | -47.7    | -78.9  | 31.4  | 7.6 Occipital_Mid_L      | 97.3  | R11              | 46.6     | -78.1  | 31.2  | 7.3 Occipital_Mid_R    | 98.3  |
|                 |          |        |       | Angular_L                | 2.7   |                  |          |        |       | Temporal_Mid_R         | 1.7   |
| L12             | -49.8    | -83.5  | 4.6   | 6.6 Occipital_Mid_L      | 73.3  | R12              | 49.1     | -83.0  | 4.9   | 6.5 Occipital_Inf_R    | 74.4  |
|                 |          |        |       | Occipital_Inf_L          | 26.7  |                  |          |        |       | Occipital_Mid_R        | 24.4  |
|                 |          |        |       |                          |       |                  |          |        |       | Temporal_Mid_R         | 1.3   |
| L13             | -51.1    | -68.3  | 42.3  | 7.1 Angular_L            | 96.6  | R13              | 50.5     | -67.5  | 42.7  | 6.6 Angular_R          | 99.0  |
|                 |          |        |       | Occipital_Mid_L          | 3.4   |                  |          |        |       | Occipital_Mid_R        | 1.0   |
| L14             | -55.2    | -72.3  | 18.4  | 7.0 Temporal_Mid_L       | 50.9  | R14              | 54.6     | -72.1  | 18.3  | 6.8 Temporal_Mid_R     | 99.1  |
|                 |          |        |       | Occipital_Mid_L          | 49.1  |                  |          |        |       | Occipital_Mid_R        | 0.9   |
| L15             | -55.7    | -72.6  | -8.1  | 5.7 Occipital_Inf_L      | 100.0 | R15              | 54.8     | -72.6  | -9.1  | 6.8 Temporal_Inf_R     | 65.6  |
|                 |          |        |       |                          |       |                  |          |        |       | Occipital_Inf_R        | 26.6  |
|                 |          |        |       |                          |       |                  |          |        |       | Cerebellum_Crus1_R     | 4.7   |
|                 |          |        |       |                          |       |                  |          |        |       | Fusiform_R             | 3.1   |
| L16             | -59.3    | -61.7  | 30.9  | 6.9 Angular_L            | 77.1  | R16              | 59.0     | -61.1  | 31.0  | 6.0 Angular_R          | 50.0  |
|                 |          |        |       | Temporal_Mid_L           | 22.9  |                  |          |        |       | Occipital_Mid_R        | 50.0  |
| L17             | -62.3    | -62.8  | 4.1   | 5.3 Temporal_Mid_L       | 100.0 | R17              | 61.7     | -62.2  | 3.9   | 5.3 Temporal_Mid_R     | 63.9  |
| L18             | -60.1    | -51.1  | 42.3  | 7.1 Angular_L            | 56.7  | R18              | 60.7     | -50.6  | 42.7  | 6.3 Angular_R          | 72.2  |
|                 |          |        |       | Parietal_Inf_L           | 36.1  |                  |          |        |       | Parietal_Inf_R         | 27.8  |
|                 |          |        |       | Supramarginal_L          | 7.2   |                  |          |        |       |                        | 7.6   |
| L19             | -65.6    | -53.1  | 17.5  | 5.8 Temporal_Mid_L       | 100.0 | R19              | 65.2     | -52.2  | 17.4  | 5.8 Temporal_Mid_R     | 100.0 |
| L20             | -66.1    | -51.4  | -9.6  | 4.0 Temporal_Inf_L       | 55.6  | R20              | 66.8     | -50.8  | -8.9  | 4.4 Temporal_Inf_R     | 100.0 |
|                 |          |        |       | Temporal_Mid_L           | 44.4  |                  |          |        |       |                        |       |
| L21             | -65.4    | -42.4  | 31.1  | 6.5 Supramarginal_L      | 89.9  | R21              | 67.0     | -41.7  | 31.0  | 6.0 Supramarginal_R    | 50.0  |
|                 |          |        |       | Temporal_Sup_L           | 10.1  |                  |          |        |       | Temporal_Sup_R         | 36.5  |
|                 |          |        |       |                          |       |                  |          |        |       | Angular_R              | 13.5  |
| L22             | -68.9    | -41.9  | 2.9   | 4.7 Temporal_Mid_L       | 100.0 | R22              | 70.3     | -41.6  | 3.1   | 4.6 Temporal_Mid_R     | 100.0 |
| L23             | -64.9    | -33.6  | 42.5  | 6.0 Parietal_Inf_L       | 64.9  | R23              | 66.4     | -32.1  | 42.6  | 5.5 Supramarginal_R    | 100.0 |
|                 |          |        |       | Supramarginal_L          | 35.1  |                  |          |        |       |                        |       |
| L24             | -68.5    | -31.6  | 17.4  | 6.7 Temporal_Sup_L       | 94.1  | R24              | 70.0     | -30.9  | 16.9  | 5.9 Temporal_Sup_R     | 97.4  |
|                 |          |        |       | Temporal_Mid_L           | 3.9   |                  |          |        |       | Temporal_Mid_R         | 2.6   |
|                 |          |        |       | Supramarginal_L          | 2.0   |                  |          |        |       |                        |       |
| L25             | -70.1    | -28.3  | -10.7 | 4.6 Temporal_Mid_L       | 100.0 | R25              | 71.8     | -28.8  | -10.2 | 3.9 Temporal_Mid_R     | 100.0 |
| L26             | -67.0    | -21.1  | 31.0  | 6.6 Supramarginal_L      | 100.0 | R26              | 68.9     | -21.4  | 30.4  | 6.2 Supramarginal_R    | 91.9  |
|                 |          |        |       |                          |       |                  |          |        |       | Temporal_Sup_R         | 8.1   |
| L27             | -69.0    | -19.4  | 1.7   | 5.8 Temporal_Mid_L       | 88.0  | R27              | 71.0     | -18.7  | 2.9   | 4.2 Temporal_Sup_R     | 100.0 |
|                 |          |        |       | Temporal_Sup_L           | 12.0  |                  |          |        |       |                        |       |
| L28             | -62.0    | -11.2  | 40.8  | 6.3 Postcentral_L        | 72.6  | R28              | 63.6     | -10.4  | 40.5  | 6.2 Supramarginal_R    | 70.2  |
|                 |          |        |       | Supramarginal_L          | 26.0  |                  |          |        |       | Postcentral_R          | 29.8  |
|                 |          |        |       | Parietal_Inf_L           | 1.4   |                  |          |        |       |                        |       |
| L29             | -66.3    | -5.3   | 18.5  | 5.4 Postcentral_L        | 100.0 | R29              | 67.9     | -5.7   | 17.9  | 5.1 Postcentral_R      | 64.3  |
|                 |          |        |       |                          |       |                  |          |        |       | Supramarginal_R        | 21.4  |
|                 |          |        |       |                          |       |                  |          |        |       | Temporal_Sup_R         | 14.3  |
| L30             | -66.5    | -4.5   | -13.1 | 4.7 Temporal_Mid_L       | 100.0 | R30              | 67.7     | -5.2   | -11.3 | 5.1 Temporal_Mid_R     | 94.3  |
|                 |          |        |       |                          |       |                  |          |        |       | Temporal_Sup_R         | 5.7   |
| L31             | -61.6    | 5.9    | 29.0  | 5.1 Precentral_L         | 81.0  | R31              | 63.9     | 6.0    | 29.5  | 5.1 Postcentral_R      | 100.0 |
|                 |          |        |       | Postcentral_L            | 19.0  |                  |          |        |       |                        |       |
| L32             | -60.9    | 9.5    | 5.8   | 5.6 Rolandic_Oper_L      | 72.0  | R32              | 62.4     | 7.9    | 5.8   | 5.8 Rolandic_Oper_R    | 66.2  |
|                 |          |        |       | Frontal_Inf_Oper_L       | 28.0  |                  |          |        |       | Temporal_Sup_R         | 20.6  |
|                 |          |        |       |                          |       |                  |          |        |       | Temporal_Pole_Sup_R    | 13.2  |
| L33             | -53.0    | 16.5   | 40.0  | 7.2 Precentral_L         | 55.1  | R33              | 53.8     | 15.3   | 40.4  | 6.3 Precentral_R       | 97.9  |
|                 |          |        |       | Frontal_Mid_L            | 44.9  |                  |          |        |       | Frontal_Mid_R          | 2.1   |
| L34             | -57.9    | 24.1   | 16.6  | 5.1 Frontal_Inf_Tri_L    | 80.0  | R34              | 60.0     | 24.3   | 17.2  | 4.7 Frontal_Inf_Oper_R | 90.9  |
|                 |          |        |       | Frontal_Inf_Oper_L       | 20.0  |                  |          |        |       | Frontal_Inf_Tri_R      | 9.1   |
| L35             | -54.0    | 29.5   | -6.9  | 7.1 Frontal_Inf_Orb_L    | 60.7  | R35              | 55.4     | 27.5   | -6.4  | 7.0 Frontal_Inf_Orb_R  | 63.3  |
|                 |          |        |       | Frontal_Inf_Tri_L        | 39.3  |                  |          |        |       | Temporal_Pole_Sup_R    | 21.1  |
|                 |          |        |       |                          |       |                  |          |        |       | Frontal_Inf_Tri_R      | 15.6  |
| L36             | -50.0    | 33.4   | 28.0  | 6.0 Frontal_Inf_Tri_L    | 54.0  | R36              | 52.9     | 33.1   | 29.1  | 5.1 Frontal_Inf_Tri_R  | 51.6  |
|                 |          |        |       | Frontal_Mid_L            | 46.0  |                  |          |        |       | Frontal_Mid_R          | 29.0  |
|                 |          |        |       |                          |       |                  |          |        |       | Frontal_Inf_Oper_R     | 19.4  |
| L37             | -53.1    | 40.3   | 2.1   | 5.2 Frontal_Inf_Tri_L    | 100.0 | R37              | 55.8     | 39.4   | 3.1   | 4.4 Frontal_Inf_Tri_R  | 100.0 |
| L38             | -39.5    | 38.5   | 38.7  | 5.9 Frontal_Mid_L        | 100.0 | R38              | 42.0     | 38.0   | 39.6  | 5.5 Frontal_Mid_R      | 100.0 |
| L39             | -44.8    | 49.6   | 16.3  | 5.3 Frontal_Mid_L        | 100.0 | R39              | 47.0     | 49.7   | 16.7  | 4.5 Frontal_Mid_R      | 100.0 |
| L40             | -44.7    | 53.4   | -7.8  | 3.8 Frontal_Mid_Orb_L    | 100.0 | R40              | 47.3     | 53.8   | -7.7  | 4.0 Frontal_Inf_Orb_R  | 66.7  |
|                 |          |        |       |                          |       |                  |          |        |       | Frontal_Mid_Orb_R      | 22.2  |
|                 |          |        |       |                          |       |                  |          |        |       | Frontal_Inf_Tri_R      | 11.1  |
| L41             | -33.8    | 54.2   | 27.9  | 5.4 Frontal_Mid_L        | 100.0 | R41              | 35.9     | 54.4   | 28.4  | 4.9 Frontal_Mid_R      | 100.0 |
| L42             | -36.9    | 62.8   | 3.8   | 5.1 Frontal_Mid_L        | 100.0 | R42              | 39.1     | 62.5   | 4.7   | 4.6 Frontal_Mid_R      | 100.0 |
| L43             | -19.7    | 53.1   | 39.9  | 5.6 Frontal_Sup_L        | 100.0 | R43              | 22.3     | 53.1   | 40.0  | 5.7 Frontal_Sup_R      | 77.6  |
|                 |          |        |       |                          |       |                  |          |        |       | Frontal_Mid_R          | 22.4  |
| L44             | -23.2    | 66.6   | 17.4  | 5.2 Frontal_Sup_L        | 95.8  | R44              | 25.4     | 67.2   | 17.3  | 4.4 Frontal_Sup_R      | 50.0  |
|                 |          |        |       | Frontal_Mid_L            | 4.2   |                  |          |        |       | Frontal_Mid_R          | 50.0  |
| L45             | -23.8    | 67.9   | -4.8  | 4.6 Frontal_Sup_L        | 44.4  | R45              | 27.3     | 68.6   | -4.8  | 4.2 Frontal_Sup_Orb_R  | 53.3  |
|                 |          |        |       | Frontal_Sup_Orb_L        | 40.7  |                  |          |        |       | Frontal_Mid_R          | 26.7  |
|                 |          |        |       | Frontal_Mid_L            | 7.4   |                  |          |        |       | Frontal_Mid_Orb_R      | 13.3  |
|                 |          |        |       | Frontal_Mid_Orb_L        | 7.4   |                  |          |        |       | Frontal_Sup_R          | 6.7   |
| L46             | -10.1    | 63.4   | 31.5  | 5.1 Frontal_Sup_Medial_L | 63.6  | R46              | 12.9     | 64.0   | 30.4  | 5.7 Frontal_Sup_R      | 71.2  |
|                 |          |        |       | Frontal_Sup_L            | 36.4  |                  |          |        |       | Frontal_Sup_Medial_R   | 28.8  |
| L47             | -12.2    | 72.2   | 7.3   | 4.7 Frontal_Sup_L        | 55.9  | R47              | 14.2     | 72.0   | 7.3   | 4.2 Frontal_Sup_R      | 68.0  |
|                 |          |        |       | Frontal_Sup_Medial_L     | 44.1  |                  |          |        |       | Frontal_Sup_Medial_R   | 32.0  |

Note: Anatomical labels are based on the Automated Anatomical Labeling map (AAL map) (Tzourio-Mazoyer et al., 2002). All values are in millimeters. SD stands for standard deviation. Abbreviations: L = Left hemisphere, R = Right hemisphere, Sup = Superior, Mid = Middle, Inf = Inferior, Oper = Opercular part, Tri = Triangular part, Orb = Orbital part.

#### Note of Table SIII: Virtual Registration via neonate AAL template

To confirm the macroanatomical labeling obtained by the virtual registration implemented in the current study, we utilized a recently published macroanatomical atlas optimized for brains of neonates and 1- and 2-year-old infants (Shi et al. 2011). This atlas is based on automatic anatomical labeling (AAL) developed by Tzourio-Mazoyer et al. (2002), and has been built up in a template representing the brain of 2-year-old babies. This does not directly represent macroanatomical structures of neonate infants, but it does so indirectly as Shi et al. (2011) observed by longitudinal comparisons of the brains. These comparative studies showed that they are macroanatomically comparable.

Since the neonate AAL atlas was constructed on an arbitrary space, it was transformed to the MNI space where our data were described. Therefore, we warped the neonate AAL atlas to the infant brain template constructed in the MNI space (Altaye et al. 2008). More specifically, we compared tissue probability maps of the 2 templates, extracted a deformation field using SPM8, and applied the deformation field to transform the neonate AAL atlas to the infant brain template in the MNI space.

As described in the main text, we performed the virtual registration of the NIRS optode and channel locations used in the current study to the neonate AAL atlas transformed to the MNI space. In essence, the 2 methods, i.e., adult-brain-mediated and neonate-brain-mediated virtual registration methods, yielded compatible macroanatomical labeling results.

#### References:

- Altaye M, Holland S.K, Wilke M, Gaser C. (2008): Infant brain probability templates for MRI segmentation and normalization. *Neuroimage*, 43: 721-730.
- Shi F, Yap P-T, Wu G, Jia H, Gilmore JH, Lin W, Shen D (2011): Infant brain atlases from neonates to 1- and 2-year-olds. *PLoS ONE* 6: e18746.
- Tzourio-Mazoyer N, Landeau B, Papathanassiou D, Crivello F, Etard O, Delcroix N, Mazoyer B, Joliot M (2002): Automated anatomical labeling of activations in SPM using a macroscopic anatomical parcellation of the MNI MRI single-subject brain. *Neuroimage* 15: 273-289.

Table SIV. Statistical results produced by *t*-test to identify channels showing significant increase of oxy-Hb signals in each time window on 8 channels of interests for both conditions.

| Sound condition |    |                 |                 |                 |                 |                 |                 |                 |  |
|-----------------|----|-----------------|-----------------|-----------------|-----------------|-----------------|-----------------|-----------------|--|
| Ch. No.         | df | 3.1-4.5 s       | 4.6-6.0 s       | 6.1-7.5 s       | 7.6-9.0 s       | 9.1-10.5 s      | 10.6-12.0 s     | 12.1-13.5 s     |  |
|                 |    | <i>t</i> -value |  |
| L02             | 39 | 0.364           | 2.397 *         | 3.619 ***       | 5.108 ***       | 5.511 ***       | 4.765 ***       | 3.505 ***       |  |
| L10             | 41 | 2.008 *         | 3.138 **        | 3.332 **        | 2.694 **        | 1.859 *         | 0.59            | -0.732          |  |
| L17             | 48 | 1.302           | 4.439 ***       | 5.887 ***       | 6.601 ***       | 6.522 ***       | 4.013 ***       | 2.342 *         |  |
| L18             | 48 | 2.717 **        | 5.969 ***       | 6.84 ***        | 6.298 ***       | 5.204 ***       | 3.854 ***       | 2.116 *         |  |
| L22             | 43 | 4.072 ***       | 6.692 ***       | 9.202 ***       | 9.548 ***       | 7.724 ***       | 4.277 ***       | 1.56            |  |
| L24             | 49 | 2.648 **        | 4.791 ***       | 6.484 ***       | 5.711 ***       | 4.86 ***        | 1.917 *         | -0.988          |  |
| L36             | 49 | 1.935 *         | 4.26 ***        | 5.467 ***       | 5.619 ***       | 5.447 ***       | 3.644 ***       | 2.281 *         |  |
| L44             | 49 | 0.329           | 1.773 *         | 2.576 **        | 3.411 ***       | 3.91 ***        | 3.652 ***       | 3.055 **        |  |

| No-sound condition |    |                 |                 |                 |                 |                 |                 |                 |  |
|--------------------|----|-----------------|-----------------|-----------------|-----------------|-----------------|-----------------|-----------------|--|
| Ch. No.            | df | 3.1-4.5 s       | 4.6-6.0 s       | 6.1-7.5 s       | 7.6-9.0 s       | 9.1-10.5 s      | 10.6-12.0 s     | 12.1-13.5 s     |  |
|                    |    | <i>t</i> -value |  |
| L02                | 41 | -0.849          | 0.632           | 1.708 *         | 3.18 **         | 4.526 ***       | 4.365 ***       | 3.556 ***       |  |
| L10                | 42 | 2.264           | 2.671 **        | 2.915 **        | 3.229 **        | 3.408 ***       | 2.784 **        | 2.31 *          |  |
| L17                | 47 | 0.064           | 1.342           | 2.367 *         | 2.689 **        | 2.066 *         | 0.476           | 0.096           |  |
| L18                | 48 | 0.591           | 1.889           | 2.464 **        | 2.465 **        | 2.48 **         | 1.345           | 0.934           |  |
| L22                | 45 | 1.498           | 2.661 **        | 2.376 *         | 1.628           | -0.462          | -3.11 **        | -3.857 ***      |  |
| L24                | 45 | -0.591          | 0.47            | 0.161           | -0.423          | -1.854 *        | -3.411 ***      | -2.437 **       |  |
| L36                | 49 | 2.275           | 3.471 ***       | 4.364 ***       | 4.694 ***       | 4.597 ***       | 3.368 ***       | 2.392 *         |  |
| L44                | 49 | -1.118          | -0.851          | -0.713          | -0.266          | 0.295           | -0.015          | 0.65            |  |

Note. To determine the effective threshold for multiple statistical testing, an FDR procedure was used. In all the tables, \*\*\*, \*\*, and \* indicate the channels that surpassed  $p < 0.001$ ,  $p < 0.01$ , and  $p < 0.05$ , respectively, with regard to the hemoglobin signals.

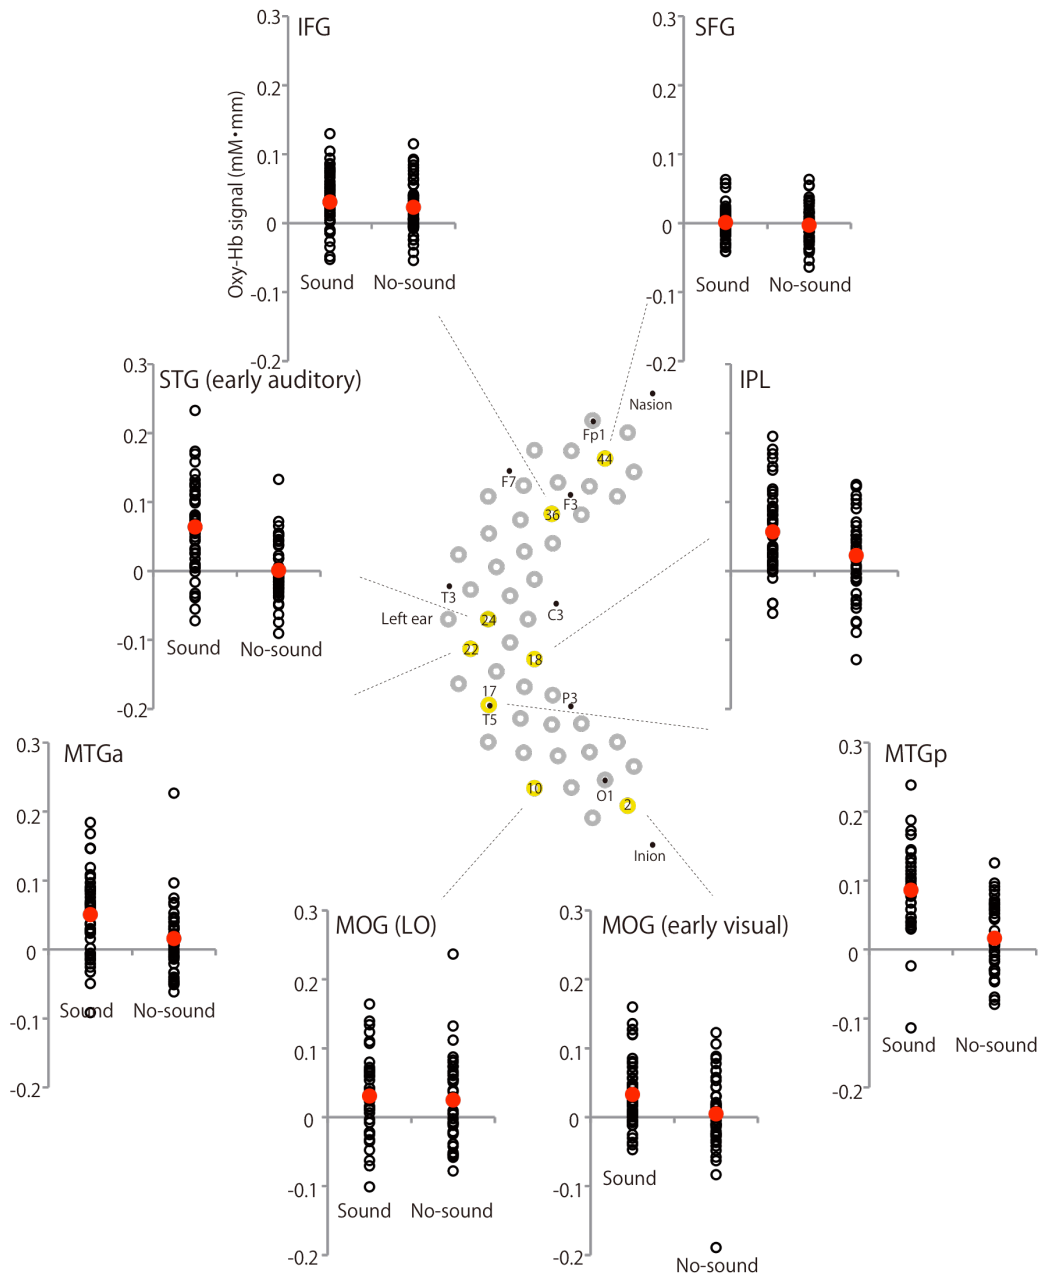

Figure S1. Individual distributions of hemodynamic responses on 8 channels of interests for both conditions. Each data shows response amplitude of oxy-Hb signals in the time window of 6.1-7.5 s. Black circles and red-filled circles describe individual data and averaged data of all infants, respectively. The displayed channels correspond to discrete cortical regions: the superior temporal gyrus (STG) including the early auditory region (L24); the anterior part of the middle temporal gyrus (MTGa) (L22); the middle occipital gyrus (MOG) including the early visual region (L2); the middle occipital gyrus (MOG) referred to as the lateral occipital (LO) region (L10); the posterior part of the middle temporal gyrus (MTGp) (L17); the inferior parietal lobule (IPL) (L18), the inferior frontal gyrus (IFG) (L36), and the superior frontal gyrus (SFG) (L44).
